# Supplementary material
Source: HighWire-hosted journal article supplement (https://bmjopen.bmj.com/content/12/6/e062702)
Supplement: inline-supplementary-material-2 [file inline-supplementary-material-2.pdf]

## Protocol for a systematic review and network meta-analysis of randomised controlled trials examining anti-inflammatory therapies in the prevention of cardiovascular events

Kevin Emery Boczar, Sheojung Shin, Kathryn A Bezzina, Aishwarya Geejo, Alexander Liam Pearson, Saba Shahab, Christophe A. Fehlmann, Sarah M Visintini, Rob Beanlands, George A. Wells

### Online Supplemental: Search Strategies

**Table 1. Medline Search**

| #  | Searches                                                                                                                                                                                                                                                                                                                                                                                                                                                                                                                                                                                                                                                                                                                                                                                                                                                                                                                                                                                                                                                                                                                                                            |
|----|---------------------------------------------------------------------------------------------------------------------------------------------------------------------------------------------------------------------------------------------------------------------------------------------------------------------------------------------------------------------------------------------------------------------------------------------------------------------------------------------------------------------------------------------------------------------------------------------------------------------------------------------------------------------------------------------------------------------------------------------------------------------------------------------------------------------------------------------------------------------------------------------------------------------------------------------------------------------------------------------------------------------------------------------------------------------------------------------------------------------------------------------------------------------|
| 1  | exp Arteriosclerosis/ or Plaque, Atherosclerotic/                                                                                                                                                                                                                                                                                                                                                                                                                                                                                                                                                                                                                                                                                                                                                                                                                                                                                                                                                                                                                                                                                                                   |
| 2  | (atherosclero* or athero-sclero* or arteriosclero* or arterial-sclero* or arteriolosclero* or arteriolo-sclero* or vascular sclero* or ASCVD or ASCAD or intima plaque).ti,ab,kf,kw.                                                                                                                                                                                                                                                                                                                                                                                                                                                                                                                                                                                                                                                                                                                                                                                                                                                                                                                                                                                |
| 3  | Acute Coronary Syndrome/ or exp Coronary Disease/                                                                                                                                                                                                                                                                                                                                                                                                                                                                                                                                                                                                                                                                                                                                                                                                                                                                                                                                                                                                                                                                                                                   |
| 4  | ((coronary adj3 (arter* or stenosis* or disease? or disorder? or syndrom?)) or CAD or SCAD).ti,ab,kf,kw.                                                                                                                                                                                                                                                                                                                                                                                                                                                                                                                                                                                                                                                                                                                                                                                                                                                                                                                                                                                                                                                            |
| 5  | exp Percutaneous Coronary Intervention/ or exp Myocardial Revascularization/                                                                                                                                                                                                                                                                                                                                                                                                                                                                                                                                                                                                                                                                                                                                                                                                                                                                                                                                                                                                                                                                                        |
| 6  | ((aortocoronary or aorto-coronary or coronary) adj3 bypass*) or CABG).ti,ab,kf,kw.                                                                                                                                                                                                                                                                                                                                                                                                                                                                                                                                                                                                                                                                                                                                                                                                                                                                                                                                                                                                                                                                                  |
| 7  | exp endarterectomy/ or exp thrombectomy/ or exp Atherectomy/ or exp Embolectomy/                                                                                                                                                                                                                                                                                                                                                                                                                                                                                                                                                                                                                                                                                                                                                                                                                                                                                                                                                                                                                                                                                    |
| 8  | (angioplast* or atherectom* or endarterectom* or thrombectom* or thromboendarterectom* or thrombo-endarterectom* or PCI or PTCA or (Percutaneous adj3 (intervent* or revascular*))).ti,ab,kf,kw.                                                                                                                                                                                                                                                                                                                                                                                                                                                                                                                                                                                                                                                                                                                                                                                                                                                                                                                                                                    |
| 9  | or/1-8                                                                                                                                                                                                                                                                                                                                                                                                                                                                                                                                                                                                                                                                                                                                                                                                                                                                                                                                                                                                                                                                                                                                                              |
| 10 | exp Anti-Inflammatory Agents, Non-Steroidal/                                                                                                                                                                                                                                                                                                                                                                                                                                                                                                                                                                                                                                                                                                                                                                                                                                                                                                                                                                                                                                                                                                                        |
| 11 | ((non-steroidal or nonsteroidal) adj2 (anti-inflammatory or antiinflammatory or analg?esic*)) or NSAID*).ti,ab,kf,kw.                                                                                                                                                                                                                                                                                                                                                                                                                                                                                                                                                                                                                                                                                                                                                                                                                                                                                                                                                                                                                                               |
| 12 | (acalabrutinib* or aceclofenac* or acemetacin* or acetaminosalol* or acetylsalicylate* or acetylsalicylic* or aclantate* or actarit* or adalimumab* or afasevikumab* or afimetroan* or alclofenac* or aldafermin* or alminoprofen* or aloxiprin* or amfenac* or aminophenazone* or aminosalicylic* or amlitelimab* or amlodipine* or ampiroxamic* or amtolmetin guacil* or anirolac* or antinflamin* or apadenoson* or apremilast* or araprofen* or ascription* or asivatrep* or astegolimab* or atibuclimab* or atliprofen* or aviptadil* or azathioprine* or azelaic acid* or bakeprofen* or balsalazide* or bardoxolone* or bardoxolone methyl* or belumosudil* or bendazac* or benorilate* or benoxaprofen* or bermoprofen* or bimosiamose* or brazikumab* or brensocatic* or brimonidine* or bromfenac* or broperamole* or bucloxic acid* or bucolome* or bufexamac* or butibufen* or camobucol* or carbasalate* or carotegrast* or carprofen* or cedirogant* or celecoxib* or cibatetide* or cicloprofen* or cimicoxib* or cinmetacin* or cinnoxamic* or clidanac* or clofezone* or clonixin* or clonixin lysine* or cloximate* or crisaborole*).ti,ab,kf,kw. |

|    |                                                                                                                                                                                                                                                                                                                                                                                                                                                                                                                                                                                                                                                                                                                                                                                                                                                                                                                                                                                                                                                                                                                                                                                            |
|----|--------------------------------------------------------------------------------------------------------------------------------------------------------------------------------------------------------------------------------------------------------------------------------------------------------------------------------------------------------------------------------------------------------------------------------------------------------------------------------------------------------------------------------------------------------------------------------------------------------------------------------------------------------------------------------------------------------------------------------------------------------------------------------------------------------------------------------------------------------------------------------------------------------------------------------------------------------------------------------------------------------------------------------------------------------------------------------------------------------------------------------------------------------------------------------------------|
| 13 | (dagrocorat* or danicopan* or dapansutril* or dapatifagene navolactibac* or darbufelone* or daxdilimab* or dazodalibep* or dehydrozingerone* or demethoxycurcumin* or deracoxib* or deucravacitinib* or dexibuprofen* or dexketoprofen* or dexpemedolac* or diclofenac* or didemethoxycurcumin* or diflunisal* or diftalone* or dimethyl fumarate* or dimethyl sulfoxide* or diphenpyramide* or ditazole* or droxicam* or duometacin* or ebdarokimab* or ebselen* or edasalonexent* or efruxifermin* or elsibucol* or emavusertib* or emorfazone* or emvododstat* or endolac* or enfenamic acid* or enflicoxib* or enpatoran* or epirizole* or etodolac* or etofenamate* or etoricoxib* or evobrutinib* or felbinac* or fenamic acid* or fenbufen* or fenclofenac* or fenclozic acid* or fendosal* or fenflumizole* or fenoprofen* or fentiazac* or fepradinol* or feprazone* or firategrast* or firocoxib* or flobufen* or flosulide* or flufenamate aluminum* or flufenamic acid* or flunixin* or flunoxaprofen* or fluproquazone* or flurbiprofen* or flutiazin* or fosdagrocorat* or fosfosal* or furaprofen* or furclopofen* or furobufen* or furofenac* or fuzapladib*).ti,ab,kf,kw. |
| 14 | (glucametacin* or gluconate zinc* or guacetisal* or guaimesal* or gusacitinib* or hydroxychloroquine* or ibrigampar* or ibufenac* or ibuprofen* or ibuproxam* or icoduline* or icosapentaenoic acid* or iguratimod* or ilonidap* or imidazole salicylate* or imisopasem manganese* or imsidolimab* or incyclinide* or indameth* or indometacin* or indoprofen* or ipsalazide* or iptacopan* or isecarosmab* or isofezolac* or isonixin* or isoxepac* or isoxicam* or itepekimab* or kebuzone* or ketoprofen* or ketoprofen lysine* or ketorolac* or lazertinib* or lazucirnon* or leflunomide* or lenabasum* or licofelone* or lifitegrast* or lirectelimab* or lobuprofen* or lonazolac* or lorecivint* or lornoxicam* or losmiprofen* or loxoprofen* or lumiracoxib* or lusvertikimab* or lyprinol* or lysine acetylsalicylate*).ti,ab,kf,kw.                                                                                                                                                                                                                                                                                                                                            |
| 15 | (mabuprofen* or magnesium salicylate* or manolide* or mapracorat* or mavacoxib* or meclofenam* or mefenamic acid* or meloxicam* or melrilimab* or mesalazine* or methotrexate* or metiazinic acid* or metoxibutropate* or milategrast* or mipragoside* or mirococept* or miroprofen* or mivavotinin* or mofebutazone* or mofezolac* or mongersen* or morazone* or morniflumate* or mosedipimod* or nabumetone* or nangibotide* or naproxinod* or naproxen* or navamepent* or nepafenac* or neurofenac* or neurotropin* or nictindole* or niflumic acid* or nimesulide* or ocarocoxib* or odalprofen* or olsalazine* or ordesekimab* or ormeloxifene* or orpanoxin* or otenaproxesul* or oxaceprol* or oxametacin* or oxaprazine* or oxaprozin* or oxicam derivative* or oxindanac* or oxyphenbutazone*).ti,ab,kf,kw.                                                                                                                                                                                                                                                                                                                                                                       |
| 16 | (palifermin* or paracetasal* or parecoxib* or pelubiprofen* or pemedolac* or perisoxal* or phenylbutazone* or phenylbutazone megallate* or picolamine salicylate* or piketoprofen* or pimeprofen* or pipebuzone* or piproxen* or pirazolac* or pifenidone* or piroxicam* or piroxicam beta cyclodextrin* or pirprofen* or plonmarlimab* or plozalizumab* or polmacoxib* or pralnacasan* or pranoprofen* or prinomide* or prinomide triethanolamine* or proglumetacin* or proquazone* or pyrazinobutazone* or quellor* or rapamycin* or rasagiline* or ravagalimab* or relfovetmab* or reltecimod* or remestemcel L* or resatorvid* or rimacalib* or rimazolium* or risankizumab* or robenacoxib* or rofecoxib* or romazarit* or rosiptor* or rosmarinic acid* or rovozolac* or rozibafusp alfa* or ruxolitinib* or salazosulfapyridine* or salicylic acid* or salnacedin* or salsalate* or satralizumab* or scalaradial* or semapimod* or semorinemab* or sibofimloc* or simufilam* or sudoxicam* or sulfosalicylate samarium* or sulindac* or suprofen* or suxibuzone*).ti,ab,kf,kw.                                                                                                      |
| 17 | (talniflumate* or tapinarof* or tazofelone* or telazorlimab* or tenidap* or tenosal* or tenosiprol* or tenoxicam* or tepoxalin* or teriflunomide* or tesnatilimab* or tiaprofenic acid* or tiaramide* or tilmacoxib* or tilnoprofen arbamel* or tilomisole* or timegadine* or tioxamast* or                                                                                                                                                                                                                                                                                                                                                                                                                                                                                                                                                                                                                                                                                                                                                                                                                                                                                                |

|    |                                                                                                                                                                                                                                                                                                                                                                                                                                                                                                                                                                                                                                                                                                                                                                                                                                                                                                                                                                                                                                                                                                                                                                                                                                                                                                                                                                                                                                                                                                                |
|----|----------------------------------------------------------------------------------------------------------------------------------------------------------------------------------------------------------------------------------------------------------------------------------------------------------------------------------------------------------------------------------------------------------------------------------------------------------------------------------------------------------------------------------------------------------------------------------------------------------------------------------------------------------------------------------------------------------------------------------------------------------------------------------------------------------------------------------------------------------------------------------------------------------------------------------------------------------------------------------------------------------------------------------------------------------------------------------------------------------------------------------------------------------------------------------------------------------------------------------------------------------------------------------------------------------------------------------------------------------------------------------------------------------------------------------------------------------------------------------------------------------------|
|    | tioxaprofen* or tirnovetmab* or tolebrutinib* or tolfenamic acid* or tolmetin* or tomaralimab* or tomicorat* or torudokimab* or tozorakimab* or tralokinumab* or tribuzone* or triethanolamine salicylate* or tropesin* or tryptamide* or ufenamate* or valategrast* or valdecoxib* or valerylsalicylic acid* or vasoactive intestinal polypeptide* or vedaprofen* or velsecorat* or vemircopan* or verramed* or vilobelimab* or vixarelimab* or ximoprofen* or zabedoseritib* or zaloglanstat* or zaltoprofen* or zaurategrast* or zidometacin* or zinc salicylate* or zoliprofen* or zomepirac*).ti,ab,kf,kw.                                                                                                                                                                                                                                                                                                                                                                                                                                                                                                                                                                                                                                                                                                                                                                                                                                                                                                |
| 18 | exp Colchicine/                                                                                                                                                                                                                                                                                                                                                                                                                                                                                                                                                                                                                                                                                                                                                                                                                                                                                                                                                                                                                                                                                                                                                                                                                                                                                                                                                                                                                                                                                                |
| 19 | (Colbenemid* or Colchichin* or colchicum* or colchily* or colchineseos* or colchimedio* or colchiquim* or colchisol* or colchysat* or colcin* or colcrys* or colctab* or colgout* or colrefuz* or colsaloid* or Condylon* or gloperba* or goutichine* or goutnil* or kolkicin* or kolkisin* or mitigare* or tolchicine*).ti,ab,kf,kw.                                                                                                                                                                                                                                                                                                                                                                                                                                                                                                                                                                                                                                                                                                                                                                                                                                                                                                                                                                                                                                                                                                                                                                          |
| 20 | (64-86-8* or SML2Y3J35T*).rn.                                                                                                                                                                                                                                                                                                                                                                                                                                                                                                                                                                                                                                                                                                                                                                                                                                                                                                                                                                                                                                                                                                                                                                                                                                                                                                                                                                                                                                                                                  |
| 21 | Prednisone/                                                                                                                                                                                                                                                                                                                                                                                                                                                                                                                                                                                                                                                                                                                                                                                                                                                                                                                                                                                                                                                                                                                                                                                                                                                                                                                                                                                                                                                                                                    |
| 22 | (adasone* or acsis* or ancortone* apo-prednisone* or bicortone* or biocortone* or cartancyl* or colisone* or Cortan* or cortancyl* or cortidelt* or cortiprex* or cotone* or cutason* or dacorten* or dacortin* or decortancyl* or decortin* or de-cortisyl* or decortisyl* or dihydrocortisone* or dihydrocortisone* or dekortin or dellacort* or deltacorten* or delta-cortelan* or delta-cortisone* or deltacortisone* or deltacortone* or delta-dome* or delta-prenovis* or deltasone* or delitison* or deltison* or deltra* or diadreson* or di-adreson* or drazone* or econosone* or encorton* or encortone* or enkorton* or enkortolon* or fernisone* or fiasone* or hostacortin* or insone* or incocortyl* or juvason* or kortancyl* or liquid pred* or lodotra* or lodtra* or lisacort* or me-korti* or meprison* or metacortandracin* or Meticorten* or meticortine* or nisona* or nizon* or novoprednisone* or nurison* or Orasone* or orisane* or panafcort* or paracort* or panasol* or parmenison* or pehacort* or predeltin* or precort* or precortal* or prednicen* or prednicorm* or prednicort* or prednicot* or predni tablinen* or prednidib* or prednilonga* or predniment* or prednison* or prednitone* or prednizon* or prednovister* or presone* or pronison* or pronizon* or pulmison* or rayos* or rectodelt* or rectrocortine* or servisone* or sone\$2 or steerometz* or sterapred* or supercortil* or ultracorten* or urtilone* or winpred* or wojtab* or zenadrid*).ti,ab,kf,kw. |
| 23 | (53-03-2 or VB0R961HZT).rn.                                                                                                                                                                                                                                                                                                                                                                                                                                                                                                                                                                                                                                                                                                                                                                                                                                                                                                                                                                                                                                                                                                                                                                                                                                                                                                                                                                                                                                                                                    |
| 24 | Methotrexate/                                                                                                                                                                                                                                                                                                                                                                                                                                                                                                                                                                                                                                                                                                                                                                                                                                                                                                                                                                                                                                                                                                                                                                                                                                                                                                                                                                                                                                                                                                  |
| 25 | (abitextrate* or abitrexate* or amethopterin* or amethopterin* or ametopterine* or antifolan* or biotrexate* or brimexate* or canceren* or emtexate* or emthexat* or emthexate* or emtrexate* or enthexate* or farmitrexat* or farmotrex* or fauldexato* or folex* or ifamet* or imeth\$2 or intradose MTX or jylamvo* or lantarel* or ledertrexate* or lumexon* or maxtrex* or medsatrexate* or metatrexan* or metex* or methoblastin* or methohexate* or methotrate* or methotrexat* or methylaminopterin* or metical* or metoject* or metotressato* or metothrexate* or metotrexat* or metotrexin* or metrex* or metrotex* or mexate* or neotrexate* or nordimet* or novatrex* or otrexup* or rasuvo* or reditrex* or reumatrex* or rheumatrex* or texate* or texorate* or tremetex* or trexall* or trexeron* or trixiem* or xaken* or xatmep* or zexate*).ti,ab,kf,kw.                                                                                                                                                                                                                                                                                                                                                                                                                                                                                                                                                                                                                                     |
| 26 | (59-05-2 or YL5FZ2Y5U1).rn.                                                                                                                                                                                                                                                                                                                                                                                                                                                                                                                                                                                                                                                                                                                                                                                                                                                                                                                                                                                                                                                                                                                                                                                                                                                                                                                                                                                                                                                                                    |
| 27 | Interleukin-1beta/                                                                                                                                                                                                                                                                                                                                                                                                                                                                                                                                                                                                                                                                                                                                                                                                                                                                                                                                                                                                                                                                                                                                                                                                                                                                                                                                                                                                                                                                                             |
| 28 | (ACZ-885* or ACZ885* or Canakinumab* or ilaris*).ti,ab,kf,kw.                                                                                                                                                                                                                                                                                                                                                                                                                                                                                                                                                                                                                                                                                                                                                                                                                                                                                                                                                                                                                                                                                                                                                                                                                                                                                                                                                                                                                                                  |
| 29 | (914613-48-2 or 37CQ2C7X93).rn.                                                                                                                                                                                                                                                                                                                                                                                                                                                                                                                                                                                                                                                                                                                                                                                                                                                                                                                                                                                                                                                                                                                                                                                                                                                                                                                                                                                                                                                                                |

|    |                                                                                                                                        |
|----|----------------------------------------------------------------------------------------------------------------------------------------|
| 30 | Antibodies, Monoclonal, Humanized/                                                                                                     |
| 31 | (pexelizumab or "h5G1.1-SC").ti,ab,kf,kw.                                                                                              |
| 32 | (219685-93-5 or CHZ6OLQ3UU).rn.                                                                                                        |
| 33 | Interleukin 1 Receptor Antagonist Protein/                                                                                             |
| 34 | (Anakinra* or Anril* or Kineret* or il-1ra* or (interleukin 1 receptor adj1 (antagonist or block* or inhibit*))).ti,ab,kf,kw.          |
| 35 | (143090-92-0 or 9013DUQ28K).rn.                                                                                                        |
| 36 | (agi-1067* or agi1067* or agz-1067* or agz1067* or probucol succinate* or Succinobucol*).ti,ab,kf,kw.                                  |
| 37 | (216167-82-7 or J1J54V24R4).rn.                                                                                                        |
| 38 | (ftx-1821* or ftx1821* or gsk-856553* or gsk856553* or gw-856553* or gw856553* or Losmapimod* or sb-856553* or sb856553*).ti,ab,kf,kw. |
| 39 | (F2DQF16BXE or 585543-15-3).rn.                                                                                                        |
| 40 | (lc1004* or lc-1004* or inclacumab* or ro4905417* or ro-4905417*).ti,ab,kf,kw.                                                         |
| 41 | (1256258-86-2 or A6734I702L).rn.                                                                                                       |
| 42 | (Atreleuton* or a85761* or a-85761* or abt761* or abt-761* or via-2291* or via2291*).ti,ab,kf,kw.                                      |
| 43 | (U301T88E1M or 154355-76-7).rn.                                                                                                        |
| 44 | (darapladib* or sb-480848* or sb480848*).ti,ab,kf,kw.                                                                                  |
| 45 | (356057-34-6 or UI1U1MYH09).rn.                                                                                                        |
| 46 | (Varespladib* or Varepladib* or ly315920* or ly-315920* or s-5920* or s5920*).ti,ab,kf,kw.                                             |
| 47 | (2Q3P98DATH or 172732-68-2).rn.                                                                                                        |
| 48 | or/10-47                                                                                                                               |
| 49 | randomized controlled trial.pt.                                                                                                        |
| 50 | controlled clinical trial.pt.                                                                                                          |
| 51 | randomized.ab.                                                                                                                         |
| 52 | placebo.ab.                                                                                                                            |
| 53 | clinical trials as topic.sh.                                                                                                           |
| 54 | randomly.ab.                                                                                                                           |
| 55 | trial.ti.                                                                                                                              |
| 56 | 49 or 50 or 51 or 52 or 53 or 54 or 55                                                                                                 |
| 57 | exp animals/ not humans.sh.                                                                                                            |
| 58 | 56 not 57                                                                                                                              |
| 59 | 9 and 48 and 58                                                                                                                        |
